# Supplementary material
Source: bioRxiv or medRxiv preprint supplement (https://www.biorxiv.org/highwire/filestream/273/field_highwire_adjunct_files/0/000992-1.pdf)
Supplement: Supplementary file [file 000992-1.pdf]

**Table S1. Clinical and laboratory data of the CLL patients studied.**

| <b>Individual Nr.</b>                   | <b>1</b>  | <b>2</b>                               | <b>3</b>                    | <b>4</b> |
|-----------------------------------------|-----------|----------------------------------------|-----------------------------|----------|
| <b>PB lymphocytes (% of leukocytes)</b> | 98        | 99                                     | 98                          | 94       |
| <b>Prior treatment</b>                  | no        | yes                                    | yes                         | no       |
| <b>SF3B1 variant frequency* (%)</b>     | 45        | 52                                     | 0                           | 0        |
| <b>SF3B1 CDS variant</b>                | c.2098A>G | c.2098A>G                              | none                        | none     |
| <b>SF3B1 AA variant</b>                 | p.K700E   | p.K700E                                | none                        | none     |
| <b>TP53 variant frequency (%)</b>       | 30        | 44; 12                                 | 32; 25                      | 80       |
| <b>TP53 CDS variant</b>                 | c.808T>C  | c.702_710del<br>CAACTACAT;<br>c.742C>T | c.617T>A;<br>c.695_719del25 | c.712T>G |
| <b>TP53 AA variant</b>                  | p.F270L   | p.Y234*;<br>p.R248W                    | p.L206*;<br>p.I232fs*6      | p.C238G  |
| <b>BRAF variant frequency (%)</b>       | 0         | 49                                     | 0                           | 0        |
| <b>BRAF CDS variant</b>                 | none      | c.1406G>C                              | none                        | none     |
| <b>BRAF AA variant</b>                  | none      | p.G469A                                | none                        | none     |
| <b>NOTCH1 variant frequency (%)</b>     | 0         | 0                                      | 50                          | 0        |
| <b>NOTCH1 CDS variant</b>               | none      | none                                   | c.7544_7545del<br>CT        | none     |
| <b>NOTCH1 AA variant</b>                | none      | none                                   | p.P2515fs*4                 | none     |

\*Variant frequencies as determined by 454 sequencing are provided.

PB = peripheral blood, CDS = coding sequence, AA = amino acid.
